# Supplementary material for: Effectively immobilizing lead through a melanotekite structure using low-temperature glass-ceramic sintering
Source: Royal Society of Chemistry journal article supplement (doi:10.1039/c9dt00320g), 2019-01-01
Supplement: c9dt00320g1.pdf [file c9dt00320g1.pdf]

## Supporting Information

### Effectively Immobilize Lead through Melanotekite Structure Using Low-Temperature Glass-Ceramic Sintering

Ying Zhou,<sup>a</sup> Changzhong Liao,<sup>\* a, b</sup> Zhengyuan Zhou,<sup>a</sup> ChungKai Chang,<sup>c</sup> and Kaimin Shih<sup>\* a</sup>

<sup>a</sup> Department of Civil Engineering, The University of Hong Kong, Pokfulam Road,  
Hong Kong, HKSAR, China

<sup>b</sup> Guangdong Key Laboratory of Integrated Agro-environmental Pollution Control and  
Management, Guangdong Institute of Eco-Environmental Science & Technology,  
Guangzhou, China

<sup>c</sup> National Synchrotron Radiation Research Center, Hsinchu Science Park, Hsinchu,  
Taiwan

\*Corresponding author:

Professor Kaimin Shih, E-mail: [kshih@hku.hk](mailto:kshih@hku.hk); Tel: +852 28591973; Fax: +852  
25595337.

Dr. Changzhong Liao, E-mail: [liaocz29@connect.hku.hk](mailto:liaocz29@connect.hku.hk)

**(9 pages including 1 text, 3 tables and 5 figures)**

## List of Supporting Information

**Text S1.** Synthesis of  $\text{Fe}_3\text{O}_4@\text{SiO}_2$  nano composites

**Table S1.** Quality of the Rietveld refinement analyses in quantifying the phase compositions of the sintered products from the  $\text{PbO}/\text{SiO}_2/\text{hematite}$  (PSH) and  $\text{PbO}/\text{SiO}_2/\text{magnetite}$  (PSM) system sintered under different temperatures for 5 h. The values indicate the pattern factors and the goodness-of-fit ( $R_{\text{exp}}$ ,  $R_{\text{wp}}$ ,  $R_{\text{p}}$ , and  $GOF$ )

**Table S2.** Chemical compositions obtained by EDX for the observed areas in Figure 5

**Table S3.** Parameters for the adsorption process by  $\text{Fe}_3\text{O}_4@\text{SiO}_2$  adsorbent treating aqueous solutions of different Pb concentrations

**Figure S1.** Elemental mapping of  $\text{PbO}/\text{SiO}_2/\text{hematite}$  samples sintered at (a)  $850^\circ\text{C}$  and (b)  $950^\circ\text{C}$ . Area A and B corresponded to melanotekite and amorphous phase; area C and D corresponded to hematite and amorphous phase.

**Figure S2.** The pH variations in the prolonged leaching tests for the thermally treated  $\text{PbO}/\text{SiO}_2/\text{hematite}$  samples sintered at different temperatures.

**Figure S3.** Lead leachability from the thermally-treated  $\text{PbO}/\text{SiO}_2/\text{hematite}$  samples after sintering at  $500\text{-}950^\circ\text{C}$  for 5 h with their corresponding  $\text{Pb}_2\text{Fe}_2\text{Si}_2\text{O}_9$  contents. The leaching solution was TCLP extraction fluid no. 1 (acetic acid solution) with the pH of 4.9 and the contact time of 18 h.

**Figure S4.** Characterization of synthetic  $\text{Fe}_3\text{O}_4@\text{SiO}_2$ . (a) XRD pattern of the prepared  $\text{Fe}_3\text{O}_4@\text{SiO}_2$ ; (b) FT-IR spectrum of  $\text{Fe}_3\text{O}_4@\text{SiO}_2$ ; (c) TEM image of the core shell  $\text{Fe}_3\text{O}_4@\text{SiO}_2$  structure and (d) electronic diffraction pattern of the as-synthesized  $\text{Fe}_3\text{O}_4@\text{SiO}_2$ .

**Figure S5.** XRD patterns of the spent  $\text{Fe}_3\text{O}_4@\text{SiO}_2$  adsorbents treating different Pb concentration solutions.

**Text S1. Synthesis of Fe<sub>3</sub>O<sub>4</sub>@SiO<sub>2</sub> nano composites**

For the synthesis of Fe<sub>3</sub>O<sub>4</sub>@SiO<sub>2</sub> nano-composites, 2.0 g ferrous chloride hydrate (FeCl<sub>2</sub>·4H<sub>2</sub>O, Alfa Aesar China, Ltd) and 5.4 g ferric chloride hydrate (FeCl<sub>3</sub>·6H<sub>2</sub>O, Sigma-Aldrich) were dissolved in 100 ml deionized water with magnetic stirring under N<sub>2</sub> atmosphere in a three-necked flask. About 50 ml ammonia (NH<sub>3</sub>·H<sub>2</sub>O, 30-33 wt. %, E. Merck, Ltd) was added into the FeCl<sub>2</sub>-FeCl<sub>3</sub> solution drop-by-drop to keep the pH at 10.0. The reactive system was maintained at 50 °C by water bath for 2 h. Then 125 ml solution containing Fe<sub>3</sub>O<sub>4</sub> nanoparticles was ultrasonically dispersed with 300 ml ethanol (95%, BDH Merck Chemical Co.) in a 500 ml beaker flask. After 5 min ultrasonic dispersion, 0.5 ml tetraethyl orthosilicate (TEOS, Alfa Aesar China, Ltd) was added to Fe<sub>3</sub>O<sub>4</sub>-NH<sub>3</sub>-H<sub>2</sub>O-Ethanol solution. The reaction solution was kept in ultrasonic condition with ice bath for about 2 h. Raw products were collected by magnet and washed by deionized water for several times. The final product of Fe<sub>3</sub>O<sub>4</sub>@SiO<sub>2</sub> was obtained after raw material was dried in oven at 60 °C for 12 h. The materials obtained are referred as Fe<sub>3</sub>O<sub>4</sub>@SiO<sub>2</sub> nanoparticles.

**Table S1.** Quality of the Rietveld refinement analyses in quantifying the phase compositions of the sintered products from the PbO/SiO<sub>2</sub>/hematite (PSH) and PbO/SiO<sub>2</sub>/magnetite (PSM) system sintered under different temperatures for 5 h. The values indicate the pattern factors and the

goodness-of-fit ( $R_{\text{exp}}$ ,  $R_{\text{wp}}$ ,  $R_{\text{p}}$ , and  $GOF$ )

| Temperature<br>(°C) | Quality of Refinement Analysis (PSH system) |                           |                          |             |
|---------------------|---------------------------------------------|---------------------------|--------------------------|-------------|
|                     | $R_{\text{exp}}^{(a)}$ (%)                  | $R_{\text{wp}}^{(a)}$ (%) | $R_{\text{p}}^{(a)}$ (%) | $GOF^{(b)}$ |
| 500                 | 2.09                                        | 4.99                      | 3.70                     | 2.39        |
| 600                 | 2.25                                        | 4.62                      | 3.55                     | 2.05        |
| 650                 | 2.14                                        | 3.76                      | 2.91                     | 1.76        |
| 700                 | 2.11                                        | 4.11                      | 2.93                     | 1.95        |
| 750                 | 2.15                                        | 4.06                      | 3.04                     | 1.88        |
| 800                 | 2.13                                        | 4.16                      | 3.16                     | 1.95        |
| 850                 | 2.11                                        | 3.89                      | 3.01                     | 1.85        |
| 900                 | 2.10                                        | 3.90                      | 3.00                     | 1.85        |

| Temperature<br>(°C) | Quality of Refinement Analysis (PSM system) |                           |                          |             |
|---------------------|---------------------------------------------|---------------------------|--------------------------|-------------|
|                     | $R_{\text{exp}}^{(a)}$ (%)                  | $R_{\text{wp}}^{(a)}$ (%) | $R_{\text{p}}^{(a)}$ (%) | $GOF^{(b)}$ |
| 500                 | 2.09                                        | 4.81                      | 3.61                     | 2.31        |
| 600                 | 2.10                                        | 4.64                      | 3.51                     | 2.21        |
| 650                 | 2.14                                        | 3.83                      | 2.94                     | 1.79        |
| 700                 | 2.12                                        | 3.81                      | 2.92                     | 1.80        |
| 750                 | 2.13                                        | 3.88                      | 3.01                     | 1.82        |
| 800                 | 2.12                                        | 4.19                      | 3.16                     | 1.97        |
| 850                 | 2.12                                        | 3.93                      | 3.01                     | 1.85        |
| 900                 | 2.11                                        | 3.97                      | 3.04                     | 1.88        |

Note:

$$(a) R_p = \frac{\sum |Y_i(\text{obs}) - Y_i(\text{calc})|}{\sum Y_i(\text{obs})}, R_{\text{wp}} = \left\{ \frac{\sum \omega_i [Y_i(\text{obs}) - Y_i(\text{calc})]^2}{\sum \omega_i [Y_i(\text{obs})]^2} \right\}^{1/2}, R_{\text{exp}} = \left\{ \frac{\sum M - P}{\sum \omega_i [Y_i(\text{obs})]^2} \right\}^{1/2}$$

$$GOF = \chi^2 = \frac{R_{\text{wp}}}{R_{\text{exp}}} = \left\{ \frac{\sum \omega_i [Y_i(\text{obs}) - Y_i(\text{calc})]^2}{M - P} \right\}^{1/2}$$

where  $Y_{i(\text{obs})}$  and  $Y_{i(\text{calc})}$  are the observed and calculated data, respectively, at data point  $m$ ;  $M$  is the number of data points;  $P$  is the number of parameters;  $i$  is the corresponding data point;  $\omega_i$  is the weighting given to data point  $m$ . The counting statistics is given by  $\omega_i = 1/\delta(Y_{i(\text{obs})})^2$ , where

$\delta(Y_{i(\text{obs})})$  is the error in  $Y_{i(\text{obs})}$ .

(b) The goodness of fit (GOF) indicated the fitting quality and it is generally considered that the GOF value between 1.0 and 2.9 is satisfactory.

**Table S2.** Chemical compositions obtained by EDX for the observed areas in Figure 5

| Area | Pb      |          | Fe      |          | Si      |          | O       |          |
|------|---------|----------|---------|----------|---------|----------|---------|----------|
|      | (wt. %) | (Atom %) |
| 1    | 58.07   | 15.35    | 18.98   | 18.61    | 8.49    | 16.55    | 14.46   | 49.50    |
| 2    | 59.57   | 16.29    | 18.37   | 18.63    | 8.56    | 17.26    | 13.51   | 47.82    |
| 3    | 70.80   | 20.09    | 4.58    | 4.82     | 9.74    | 20.40    | 14.88   | 54.69    |
| 4    | —       | —        | 73.18   | 43.87    | —       | —        | 26.82   | 56.13    |

**Table S3.** Parameters for the adsorption process by  $\text{Fe}_3\text{O}_4@\text{SiO}_2$  adsorbent treating aqueous solutions of different Pb concentrations

| Pb concentration | Initial pH | Adsorbed Pb (mg) | $m_{(\text{adsorbent})}$ (mg) | Removal efficiency (%) |
|------------------|------------|------------------|-------------------------------|------------------------|
| 1000 ppm         | 6.56       | 18.1             | 100                           | 67.5                   |
| 100 ppm          | 6.60       | 3.22             | 100                           | 99.7                   |
| 10 ppm           | 6.63       | 0.36             | 100                           | 99.5                   |

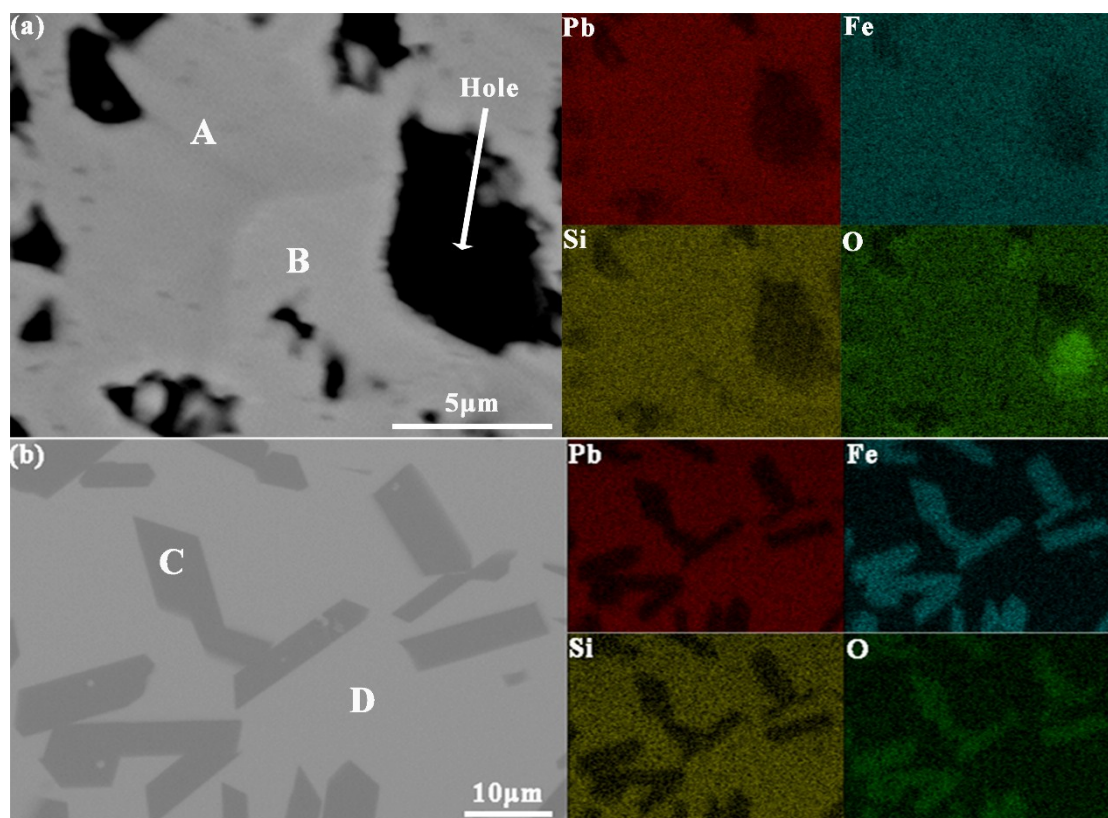

**Figure S1.** Elemental mapping of PbO/SiO<sub>2</sub>/hematite samples sintered at (a) 850°C and (b) 950°C. Area A and B corresponded to melanotekite and amorphous phase; area C and D corresponded to hematite and amorphous phase.

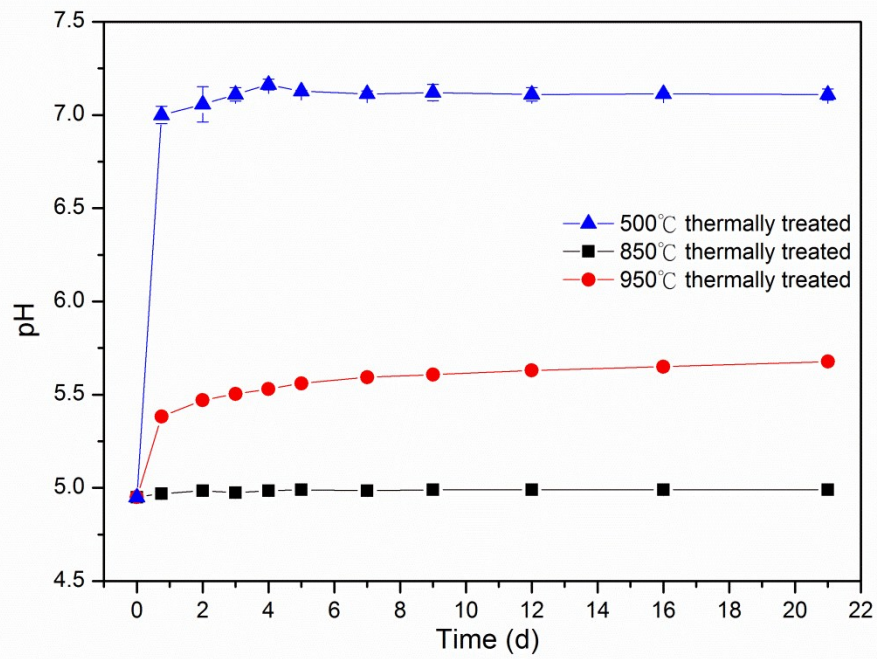

**Figure S2.** The pH variations in the prolonged leaching tests for the thermally treated PbO/SiO<sub>2</sub>/hematite samples sintered at different temperatures.



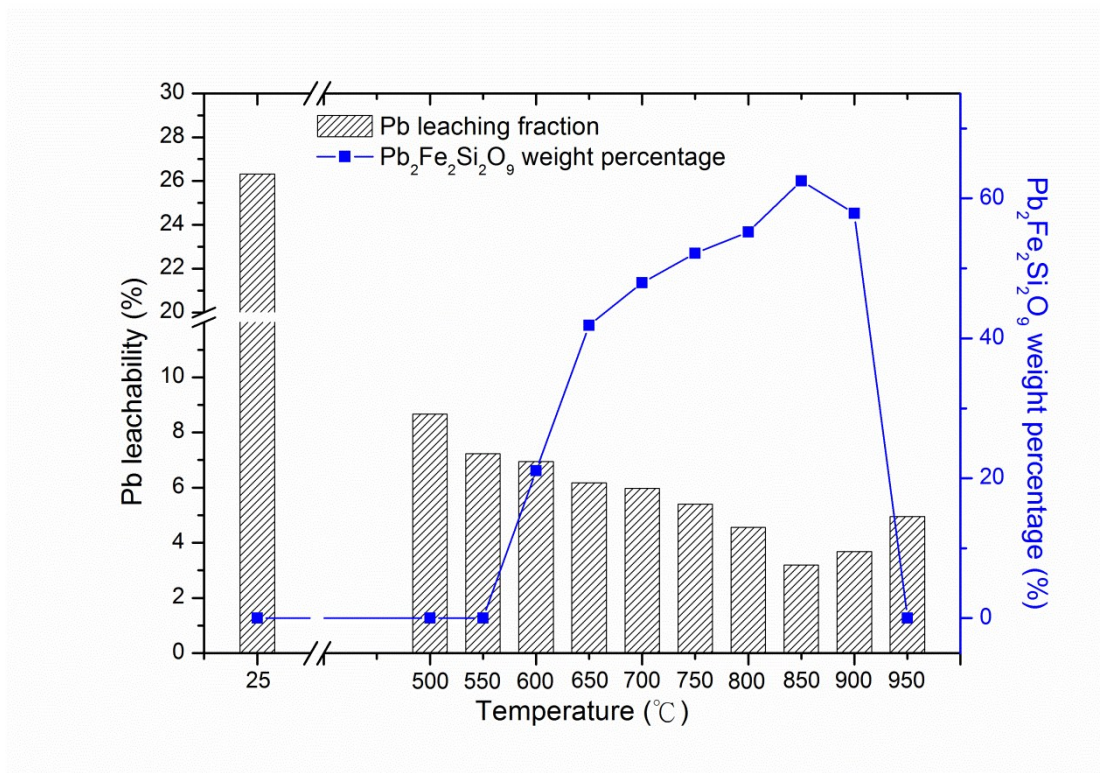

**Figure S3.** Lead leachability from the thermally-treated PbO/SiO<sub>2</sub>/hematite samples after sintering at 500-950 °C for 5 h with their corresponding Pb<sub>2</sub>Fe<sub>2</sub>Si<sub>2</sub>O<sub>9</sub> contents. The leaching solution was TCLP extraction fluid no. 1 (acetic acid solution) with the pH of 4.9 and the contact time of 18 h.

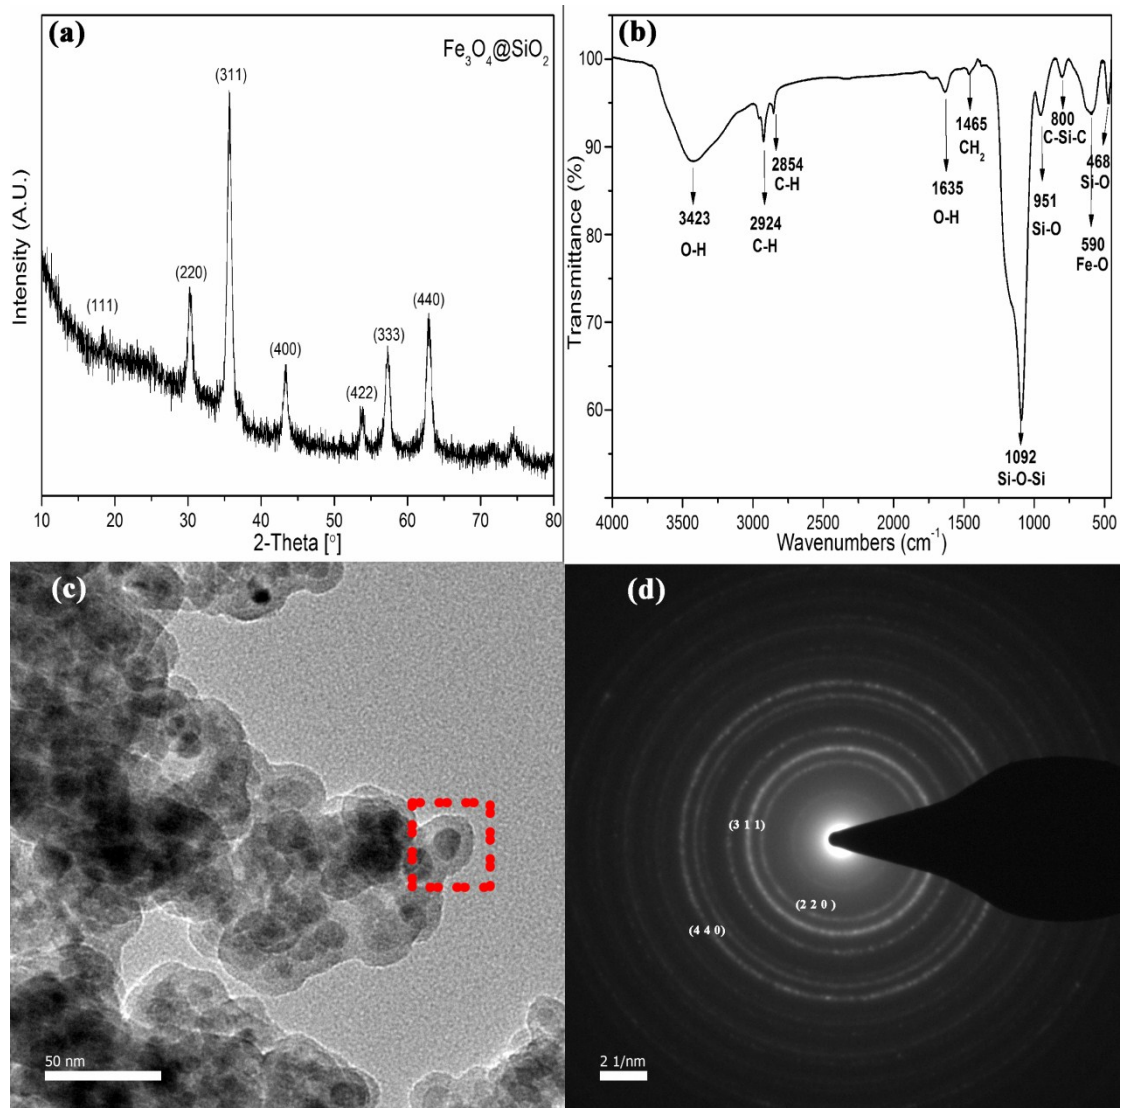

**Figure S4.** Characterization of synthetic  $\text{Fe}_3\text{O}_4@\text{SiO}_2$ . (a) XRD pattern of the prepared  $\text{Fe}_3\text{O}_4@\text{SiO}_2$ ; (b) FT-IR spectrum of  $\text{Fe}_3\text{O}_4@\text{SiO}_2$ ; (c) TEM image of the core shell  $\text{Fe}_3\text{O}_4@\text{SiO}_2$  structure and (d) electronic diffraction pattern of the as-synthesized  $\text{Fe}_3\text{O}_4@\text{SiO}_2$ .

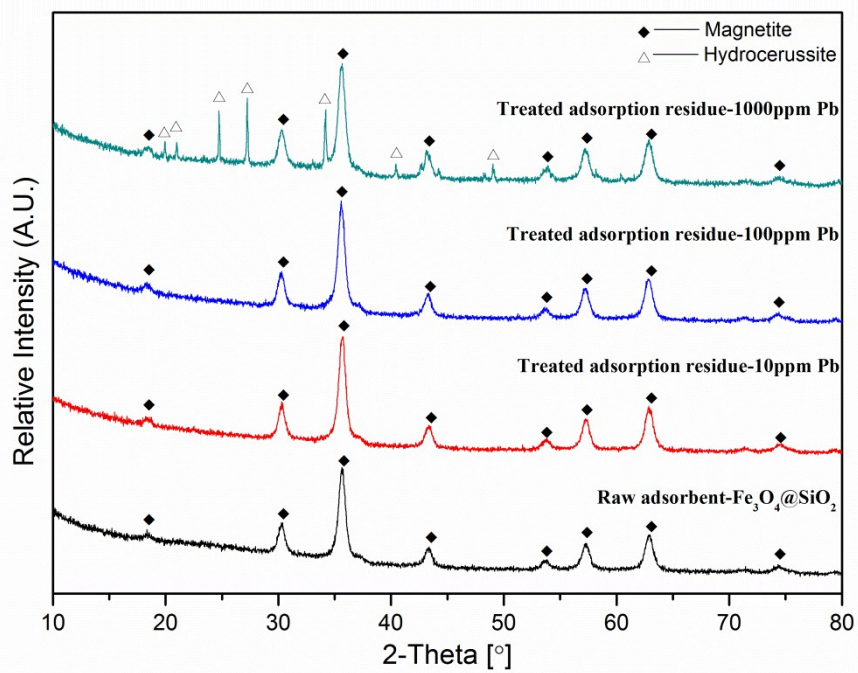

**Figure S5.** XRD patterns of the spent  $\text{Fe}_3\text{O}_4@\text{SiO}_2$  adsorbents treating different Pb concentration solutions.
